# Supplementary material for: A Prequel to the Dantean Anomaly: The Water Seesaw and Droughts of 1302–1307 in Europe
Source: Copernicus journal article supplement (doi:10.5194/cp-2020-34), 2020-05-20
Supplement: Supplementary file 1 [file Supplementary Information 1 - Climate and Drought Indices.xlsx]

## Sheet: Climate Indices FR and IT
Season	FR Temp	FR Precip	IT Temp	IT Precip
1289/90	3
1290	-1	1
1290/91
1291
1291/92	-3		1	-1
1292
1292/93			1
1293	1	-1	2	-2
1293/94	-3			1
1294	-1
1294/95		2	1	3
1295				1
1295/96			1	-1
1296				1
1296/97		2		1
1297	1	-1
1297/98			-1	1
1298
1298/99			-1	1
1299				1
1299/1300
1300			1
1300/1				1
1301				2
1301/2	1			1
1302	-1	2		-1
1302/3	-2		2	-3
1303	1	-1	1	-3
1303/4	2		-3	-2
1304	2	-3		,
1304/5	-1		-1	3
1305		-2		1
1305/6	-3		-3	1
1306		-2
1306/7			1	2
1307			1	-1
1307/8				2
1308	-1
1308/9
1309				1
1309/10				3
1310				2
1310/11	-2		-2	2
1311		1		3
1311/12			1	-1
1312	2		2	1
1312/13				1
1313			1	-3
1313/14			1	2
1314
1314/15			2
1315	-2	3		1
1315/16			1	2
1316	-2	2		-1
1316/17	-1		-3	2
1317			1	-1
1317/18			-3	1
1318
1318/19			-3	3
1319				1
1319/20			-1
1320
1320/21			-1

## Sheet: Precip CE
Season	Precip S. Germany/Austria	Precip Rhine/Main	Precip Bohemian Crown	Precip N. Germany	Precip Teut. Order	Precip Central Germany
1289/90
1290
1290/91
1291
1291/92	1
1292
1292/93
1293
1293/94
1294
1294/95		1
1295
1295/96
1296
1296/97
1297
1297/98
1298
1298/99
1299
1299/1300
1300
1300/1
1301
1301/2
1302	2	1
1302/3
1303	1
1303/4
1304	-2	-3
1304/5
1305
1305/6		1
1306
1306/7
1307			-3
1307/8
1308
1308/9
1309						1
1309/10
1310	1		1			1
1310/11
1311
1311/12
1312
1312/13
1313	-1
1313/14
1314	2
1314/15
1315	1		0
1315/16	1
1316	2		2		2	1
1316/17	1		1		2
1317
1317/18
1318
1318/19
1319			-1
1319/20
1320
1320/21				1

## Sheet: Temp CE
Season	Temp S. Germany/Austria	Temp Rhine/Main	Temp Bohemian Crown	Temp N. Germany	Temp Teut. Order	Temp Central Germany
1289/90	2
1290	-1
1290/91
1291
1291/92	0
1292
1292/93
1293
1293/94
1294
1294/95		-1
1295	1	-1
1295/96	1					-1
1296
1296/97
1297
1297/98
1298
1298/99
1299
1299/1300
1300
1300/1
1301
1301/2
1302	-1	-1
1302/3	-2		2
1303						-1
1303/4		2	-1
1304
1304/5		-2
1305
1305/6		-1		-2
1306
1306/7	-1
1307
1307/8			-1
1308
1308/9
1309						1
1309/10	-1	-1
1310
1310/11	-1		-2
1311
1311/12
1312
1312/13
1313	1
1313/14
1314
1314/15
1315
1315/16
1316
1316/17			-3
1317
1317/18
1318
1318/19
1319			1
1319/20
1320
1320/21

## Sheet: Drought indices & blazes
	NORTH/CENTRAL ITALY					EASTERN FRANCE					CENTRAL EUROPE
	DJF	MAM	JJA	SON	blazes	DJF	MAM	JJA	SON	blazes	DJF	MAM	JJA	SON	blazes
1200							2
1201															1
1202
1203
1204		3	3		1		2						2
1205
1206
1207					1			2
1208													2
1209
1210										1
1211															1
1212
1213					1
1214					1
1215						2									1
1216
1217													2		1
1218
1219							2			1
1220
1221															1
1222
1223
1224
1225							2	3			2
1226							2	2
1227	2
1228
1229
1230										1					1
1231															1
1232								2					2		1
1233			3
1234															1
1235			3					2		1					1
1236
1237															1
1238
1239
1240
1241						2	2	2					2		1
1242															1
1243			2	2
1244													3		1
1245	2
1246
1247
1248													2	2	3
1249															1
1250					1
1251														3	1
1252		2			1					1
1253
1254
1255															1
1256
1257
1258															2
1259												2	2		1
1260										1				2	1
1261															1
1262		3	3										2		5
1263
1264
1265
1266	2				1			3					2		1
1267								2					2		1
1268							2	2
1269					1
1270													2		1
1271															1
1272
1273									2
1274
1275
1276														2	2
1277		2	2					3
1278					2							2	3	2	1
1279															2
1280															2
1281
1282			2		1
1283												2
1284									2						1
1285			3										2		1
1286		2	2		1					1					2
1287					1			2		1
1288								2							1
1289															1
1290															1
1291															1
1292	2
1293			2		1			2		1
1294
1295
1296	2											2	2
1297
1298										1					1
1299															2
1300															1
1301
1302			2	2	2					1
1303	3	2	3	3
1304	2				4		2	3	2			3	3		1
1305						2		3		4	2				2
1306						2									1
1307			2		1								3
1308					1										2
1309
1310
1311	2				1										2
1312															1
1313			3		2			3							3
1314															1
1315
1316			2												1
1317			2
1318															1
1319
1320															1
1321										1
1322			2	2	1							2
1323	2				1
1324	2	2			1					1	2
1325	2				3			3							1
1326								3					3		1
1327									1						3
1328		3			1								2		2
1329				3	1
1330		2	3		1			3
1331							2	3
1332					1							3	3		1
1333		3	3					2							1
1334					3			2		1					2
1335
1336								2
1337													3
1338															1
1339								2		1					2
1340					1										4
1341															1
1342												2			5
1343										1
1344					2								2
1345			2		1
1346
1347					1										3
1348											2		3
1349					1										2
1350							2								3
1351					1								3		2
1352			2	2				3		1			3
1353		3								1					1
1354										2
1355	2		2	2	1
1356							2				2				1
1357
1358
1359
1360	2		2					2	2
1361					1	2						2	3	2	2
1362	2
1363															1
1364										1					1
1365					1					1
1366
1367															1
1368								2		1		2
1369															2
1370												2			1
1371			2									2			2
1372															4
1373	2									2
1374										1
1375															1
1376								2	2						4
1377										1
1378
1379														2	5
1380			2
1381												2
1382					1			2							3
1383					1										3
1384		2					2	3		2				2	1
1385							2	3		1					3
1386															2
1387								1							3
1388															3
1389															1
1390
1391													3		3
1392															1
1393								3					3		1
1394															1
1395							2								2
1396					1					1					1
1397										1					1
1398
1399															1
1400
